# Supplementary material for: TERT Promoter and BRAF V600E Mutations in Papillary Thyroid Cancer: A Single-Institution Experience in Korea
Source: MDPI journal article supplement (doi:10.3390/cancers14194928), 2022-10-08
Supplement: s1 [file s1]

Table S1. Baseline characteristics.

| Characteristics          | No. (n = 7797) |
|--------------------------|----------------|
| Age (yr)                 | 43.25 ± 12.20  |
| <55                      | 6250 (80.2)    |
| ≥55                      | 1547 (19.8)    |
| Sex                      |                |
| Male                     | 1804 (23.1)    |
| Female                   | 5993 (76.9)    |
| Tumor size (cm)          | 0.91 ± 0.69    |
| ≤1.0                     | 5592 (71.7)    |
| >1.0                     | 2205 (28.3)    |
| Multiplicity             |                |
| Single                   | 5215 (66.9)    |
| Multiple                 | 2582 (33.1)    |
| Extrathyroidal extension |                |
| Absent                   | 7062 (90.6)    |
| Present                  | 735 (9.4)      |
| Histology                |                |
| Classic                  | 7182 (92.1)    |
| Follicular variant       | 405 (5.2)      |
| Tall-cell variant        | 79 (1.0)       |
| Others                   | 131 (1.7)      |
| Histology                |                |
| Classic                  | 7182 (92.1)    |
| Variant                  | 615 (7.9)      |
| BRAF V600E               |                |
| Absent                   | 1251 (16.0)    |
| Present                  | 6546 (84.0)    |
| Perinodal infiltration   |                |
| Absent                   | 7066 (90.6)    |
| Present                  | 731 (9.4)      |
| T stage                  |                |
| T1                       | 6794 (87.1)    |
| T2                       | 242 (3.1)      |
| T3                       | 528 (6.8)      |
| T4                       | 233 (3.0)      |
| T stage                  |                |
| T1-T2                    | 7036 (90.2)    |
| T3-T4                    | 761 (9.8)      |
| N stage                  |                |
| N0                       | 4311 (55.3)    |
| N1a                      | 2716 (34.8)    |
| N1b                      | 770 (9.9)      |
| N stage                  |                |
| N0                       | 4311 (55.3)    |
| N1a-N1b                  | 3486 (44.7)    |
| M stage                  |                |
| M0                       | 7774 (99.7)    |
| M1                       | 23 (0.3)       |

|                                                                              |             |
|------------------------------------------------------------------------------|-------------|
| TNM stage                                                                    |             |
| I                                                                            | 6561 (84.1) |
| II                                                                           | 1164 (14.9) |
| III                                                                          | 59 (0.8)    |
| IV                                                                           | 13 (0.2)    |
| TNM stage                                                                    |             |
| I-II                                                                         | 7725 (99.1) |
| III-IV                                                                       | 72 (0.9)    |
| Radioactive iodine therapy                                                   |             |
| No                                                                           | 6311 (80.9) |
| Yes                                                                          | 1486 (19.1) |
| Values are expressed as the mean $\pm$ standard deviation or as numbers (%). |             |
